# Supplementary material for: A theoretical study on the structures and electronic and magnetic properties of new boron nitride composite nanosystems by depositing superhalogen Al13on the surface of nanosheets/nanoribbons
Source: Royal Society of Chemistry journal article supplement (doi:10.1039/c8cp00015h), 2018-01-01
Supplement: c8cp00015h1.pdf [file c8cp00015h1.pdf]

## Electronic Supplementary Information

**A Theoretical Study on the Structures, Electronic and Magnetic Properties of  
New Boron Nitrogen Composite Nanosystems by Depositing Superhalogen Al<sub>13</sub>  
on the Surface of Nanosheet/Nanoribbons**

Xiaopeng Shen, Guangtao Yu\*, Chenghui Zhang, Ting Wang, Xuri Huang and Wei  
Chen\*

*Laboratory of Theoretical and Computational Chemistry, Institute of Theoretical  
Chemistry, Jilin University, Changchun 130023, People's Republic of China*

\*To whom correspondence should be addressed. Email: [yugt@jlu.edu.cn](mailto:yugt@jlu.edu.cn) (G.Y.),  
[w\\_chen@jlu.edu.cn](mailto:w_chen@jlu.edu.cn) (W.C.)

In this work, when adsorbing the superhalogen Al<sub>13</sub> on the surface of 2D BNML, twenty-one typical adsorption situations have been considered. The optimized geometries and relative energies for all these composite Al<sub>13</sub>-BNML systems have been presented in Table S1 and Figure S1. For convenience, these new structures have been named according to the following rules:

(1) When the top site of Al atom (T<sub>Al</sub>) in Al<sub>13</sub> cluster interacting with the top site of B atom (T<sub>B</sub>), top site of N atom (T<sub>N</sub>), bridge site over B–N bond (B<sub>B-N</sub>) and hollow site of BN hexagon ring (H<sub>BN</sub>) on the surface of BNML, four obtained composite systems are named as X-Al<sub>13</sub>(T<sub>Al</sub>)@BNML (X= T<sub>B</sub>, T<sub>N</sub>, B<sub>B-N</sub> and H<sub>BN</sub>), in which Al<sub>13</sub>(T<sub>Al</sub>) represents one single Al atom in Al<sub>13</sub> cluster is adsorbed on BNML.

(2) When the bridge of Al–Al bond (B<sub>Al-Al</sub>) in Al<sub>13</sub> cluster interacting with the surface of BNML, eight Al<sub>13</sub>-modified BNML systems are obtained, and they are named as X/X'-Al<sub>13</sub>(B<sub>Al-Al</sub>)@BNML (X or X'= T<sub>B</sub>, T<sub>N</sub>, B<sub>B-N</sub> and H<sub>BN</sub>), including T<sub>B</sub>/T<sub>B</sub>-Al<sub>13</sub>(B<sub>Al-Al</sub>)@BNML, T<sub>N</sub>/T<sub>N</sub>-Al<sub>13</sub>(B<sub>Al-Al</sub>)@BNML, B<sub>B-N</sub>/B<sub>B-N</sub>-Al<sub>13</sub>(B<sub>Al-Al</sub>)@BNML, H<sub>BN</sub>/H<sub>BN</sub>-Al<sub>13</sub>(B<sub>Al-Al</sub>)@BNML, T<sub>B</sub>/T<sub>N</sub>-Al<sub>13</sub>(B<sub>Al-Al</sub>)@BNML, T<sub>B</sub>/H<sub>BN</sub>-Al<sub>13</sub>(B<sub>Al-Al</sub>)@BNML, T<sub>N</sub>/H<sub>BN</sub>-Al<sub>13</sub>(B<sub>Al-Al</sub>)@BNML and T<sub>B</sub>/H<sub>BN</sub>-Al<sub>13</sub>(B<sub>Al-Al</sub>)@BNML, respectively. Here, Al<sub>13</sub>(B<sub>Al-Al</sub>) represents Al–Al bond of Al<sub>13</sub> cluster, and X/X' means the adsorption sites on BNML for two Al atoms in Al–Al bond.

(3) When the three-membered ring (H<sub>Al</sub>) in Al<sub>13</sub> cluster interacting with the surface of BNML, nine Al<sub>13</sub>-modified BNML systems are obtained, and they are named as X/X'/X''-Al<sub>13</sub>(H<sub>Al</sub>)@BNML-*Y<sub>center</sub>* (X, X' or X''= T<sub>B</sub>, T<sub>N</sub>, B<sub>B-N</sub>, H<sub>BN</sub>; *Y<sub>center</sub>* = *T<sub>Bcenter</sub>*, *T<sub>Ncenter</sub>*, *B<sub>B-Ncenter</sub>*, *H<sub>BNcenter</sub>*), including T<sub>B</sub>/T<sub>B</sub>/T<sub>B</sub>-Al<sub>13</sub>(H<sub>Al</sub>)@BNML-*T<sub>Ncenter</sub>*, T<sub>B</sub>/T<sub>B</sub>/T<sub>B</sub>-Al<sub>13</sub>(H<sub>Al</sub>)@BNML-*B<sub>B-Ncenter</sub>*, T<sub>N</sub>/T<sub>N</sub>/T<sub>N</sub>-Al<sub>13</sub>(H<sub>Al</sub>)@BNML-*T<sub>Bcenter</sub>*, T<sub>N</sub>/T<sub>N</sub>/T<sub>N</sub>-Al<sub>13</sub>(H<sub>Al</sub>)@BNML-*H<sub>BNcenter</sub>*, B<sub>B-N</sub>/B<sub>B-N</sub>/B<sub>B-N</sub>-Al<sub>13</sub>(H<sub>Al</sub>)@BNML-*T<sub>Ncenter</sub>*, B<sub>B-N</sub>/B<sub>B-N</sub>/B<sub>B-N</sub>-Al<sub>13</sub>(H<sub>Al</sub>)@BNML-*H<sub>BNcenter</sub>*, H<sub>BN</sub>/H<sub>BN</sub>/H<sub>BN</sub>-Al<sub>13</sub>(H<sub>Al</sub>)@BNML-*T<sub>Bcenter</sub>*, H<sub>BN</sub>/H<sub>BN</sub>/H<sub>BN</sub>-Al<sub>13</sub>(H<sub>Al</sub>)@BNML-*T<sub>Ncenter</sub>* and T<sub>B</sub>/T<sub>B</sub>/T<sub>N</sub>-Al<sub>13</sub>(H<sub>Al</sub>)@BNML-*T<sub>Ncenter</sub>*, respectively. Here, Al<sub>13</sub>(H<sub>Al</sub>) means the three-membered ring of Al<sub>13</sub> cluster, X/X'/X'' represents the adsorption sites on BNML for three Al atoms in the three-membered ring, and *Y<sub>center</sub>* means that the center of the adsorbed three-membered ring in Al<sub>13</sub> cluster locating over the site on the BNML surface.

By comparison, we can find that adsorbing the superhalogen Al<sub>13</sub> at the top of N atom (T<sub>N</sub>) can obtain the most energetically stable configuration for the modified BNML systems (Table S1), which is named as T<sub>N</sub>-Al<sub>13</sub>(T<sub>Al</sub>)@BNML. In this work, therefore, we will mainly focus on the Al<sub>13</sub>-modified BN nanosystems at the T<sub>N</sub> site.

**Table S1** The relative energies  $\Delta E$  (meV) of different magnetic couplings to the ground state, the adsorption energy  $E_{ad}$  (eV), the total magnetic moment ( $M_{tot}$ ) for the obtained composite Al<sub>13</sub>-BNML systems. The NM and FM represent the nonmagnetic and ferromagnetic spin couplings, respectively.

| Systems                                                                                                        | $\Delta E$ (meV) |     | $E_{ad}$ (eV) | $M_{tot}$<br>( $\mu_B$ ) |
|----------------------------------------------------------------------------------------------------------------|------------------|-----|---------------|--------------------------|
|                                                                                                                | NM               | FM  |               |                          |
| Al <sub>13</sub>                                                                                               | 108.8            | 0.0 | --            | 1.0                      |
| BNML                                                                                                           | 0.0              | --  | --            | 0.0                      |
| T <sub>B</sub> -Al <sub>13</sub> (T <sub>Al</sub> )@BNML                                                       | 90.3             | 0.0 | -0.601        | 1.0                      |
| T <sub>N</sub> -Al <sub>13</sub> (T <sub>Al</sub> )@BNML                                                       | 190.0            | 0.0 | -0.851        | 1.0                      |
| B <sub>B-N</sub> -Al <sub>13</sub> (T <sub>Al</sub> )@BNML                                                     | 111.9            | 0.0 | -0.619        | 1.0                      |
| H <sub>BN</sub> -Al <sub>13</sub> (T <sub>Al</sub> )@BNML                                                      | 143.4            | 0.0 | -0.599        | 1.0                      |
| T <sub>B</sub> /T <sub>B</sub> -Al <sub>13</sub> (B <sub>Al-Al</sub> )@BNML                                    | 110.0            | 0.0 | -0.649        | 1.0                      |
| T <sub>N</sub> /T <sub>N</sub> -Al <sub>13</sub> (B <sub>Al-Al</sub> )@BNML                                    | 108.0            | 0.0 | -0.715        | 1.0                      |
| B <sub>B-N</sub> /B <sub>B-N</sub> -Al <sub>13</sub> (B <sub>Al-Al</sub> )@BNML                                | 37.7             | 0.0 | -0.672        | 1.0                      |
| H <sub>BN</sub> /H <sub>BN</sub> -Al <sub>13</sub> (B <sub>Al-Al</sub> )@BNML                                  | 80.8             | 0.0 | -0.699        | 1.0                      |
| T <sub>B</sub> /T <sub>N</sub> -Al <sub>13</sub> (B <sub>Al-Al</sub> )@BNML                                    | 108.9            | 0.0 | -0.672        | 1.0                      |
| T <sub>B</sub> /H <sub>BN</sub> -Al <sub>13</sub> (B <sub>Al-Al</sub> )@BNML                                   | 46.5             | 0.0 | -0.693        | 1.0                      |
| T <sub>N</sub> /H <sub>BN</sub> -Al <sub>13</sub> (B <sub>Al-Al</sub> )@BNML                                   | 108.5            | 0.0 | -0.708        | 1.0                      |
| T <sub>B</sub> /H <sub>BN</sub> -Al <sub>13</sub> (B <sub>Al-Al</sub> )@BNML                                   | 106.8            | 0.0 | -0.664        | 1.0                      |
| T <sub>B</sub> /T <sub>B</sub> /T <sub>B</sub> -Al <sub>13</sub> (H <sub>Al</sub> )@BNML- $T_{Ncenter}$        | 99.5             | 0.0 | -0.736        | 1.0                      |
| T <sub>B</sub> /T <sub>B</sub> /T <sub>B</sub> -Al <sub>13</sub> (H <sub>Al</sub> )@BNML- $B_{B-Ncenter}$      | 100.7            | 0.0 | -0.759        | 1.0                      |
| T <sub>N</sub> /T <sub>N</sub> /T <sub>N</sub> -Al <sub>13</sub> (H <sub>Al</sub> )@BNML- $T_{Bcenter}$        | 106.1            | 0.0 | -0.770        | 1.0                      |
| T <sub>N</sub> /T <sub>N</sub> /T <sub>N</sub> -Al <sub>13</sub> (H <sub>Al</sub> )@BNML- $H_{BNcenter}$       | 99.9             | 0.0 | -0.730        | 1.0                      |
| B <sub>B-N</sub> /B <sub>B-N</sub> /B <sub>B-N</sub> -Al <sub>13</sub> (H <sub>Al</sub> )@BNML- $T_{Ncenter}$  | 99.3             | 0.0 | -0.718        | 1.0                      |
| B <sub>B-N</sub> /B <sub>B-N</sub> /B <sub>B-N</sub> -Al <sub>13</sub> (H <sub>Al</sub> )@BNML- $H_{BNcenter}$ | 100.3            | 0.0 | -0.753        | 1.0                      |
| H <sub>BN</sub> /H <sub>BN</sub> /H <sub>BN</sub> -Al <sub>13</sub> (H <sub>Al</sub> )@BNML- $T_{Bcenter}$     | 100.7            | 0.0 | -0.760        | 1.0                      |
| H <sub>BN</sub> /H <sub>BN</sub> /H <sub>BN</sub> -Al <sub>13</sub> (H <sub>Al</sub> )@BNML- $T_{Ncenter}$     | 91.9             | 0.0 | -0.761        | 1.0                      |
| T <sub>B</sub> /T <sub>B</sub> /T <sub>N</sub> -Al <sub>13</sub> (H <sub>Al</sub> )@BNML- $T_{Ncenter}$        | 100.8            | 0.0 | -0.763        | 1.0                      |

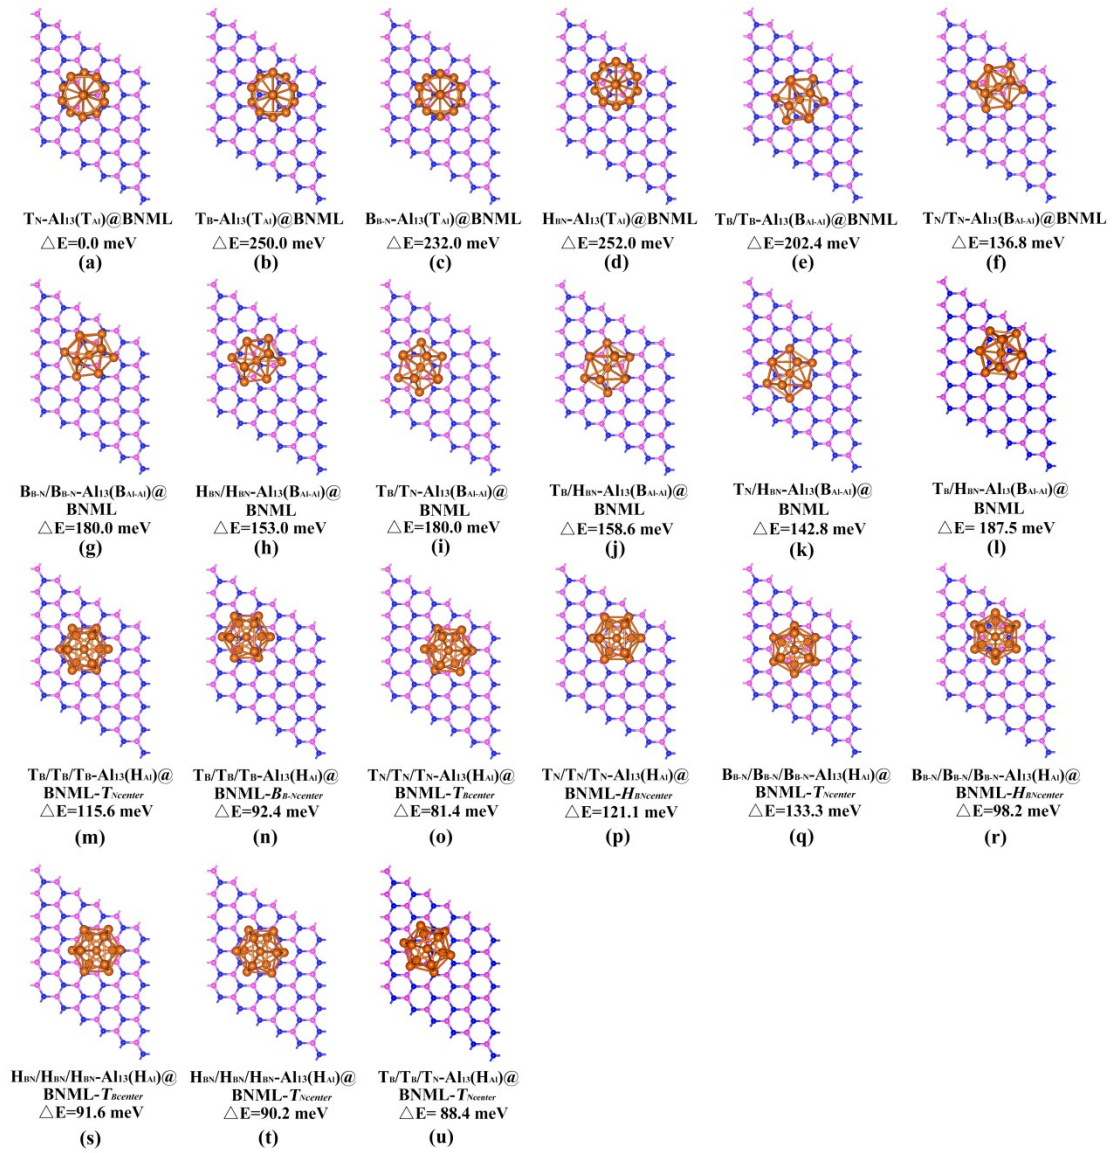

**Figure S1.** The geometries and relative energies of obtained composite Al<sub>13</sub>-BNML systems. The brown, pink and blue balls represent Al, B and N atoms, respectively.

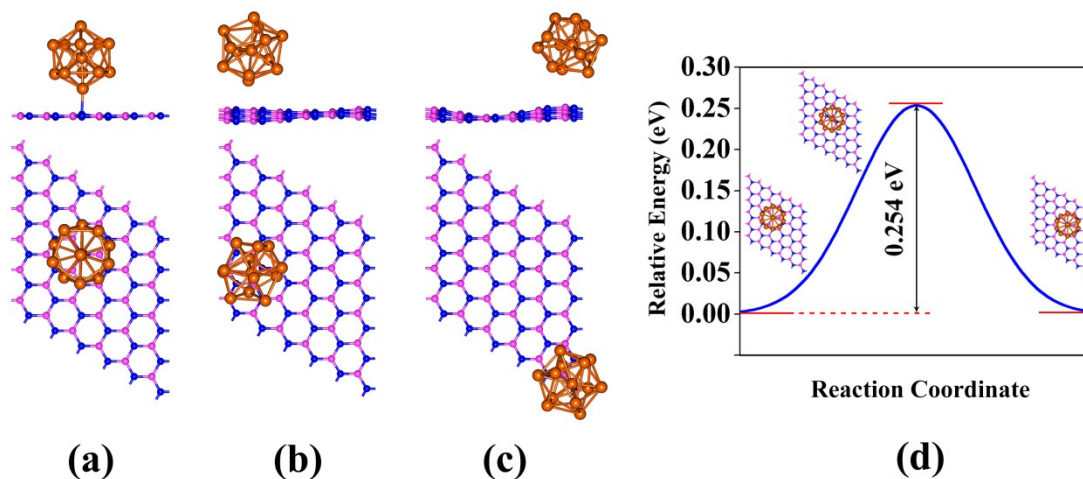

**Figure S2.** Starting from the initial structure  $T_N\text{-Al}_{13}(T_{Al})@BNML$  (a), *ab initio* molecular dynamics simulation is run for 2 ps, where increasing the temperature from 0 to 350 K within the first 1.4 ps, the composite configuration  $T_B/H_{BN}\text{-Al}_{13}(B_{Al})@BNML$  (b) can be obtained, while the composite configuration  $T_B/T_B/T_N\text{-Al}_{13}(H_{Al})@BNML\text{-}T_{Ncenter}$  (c) can be obtained, when keeping at 350 K for 0.6 ps. (d) Minimum-energy pathway for the  $\text{Al}_{13}$  moving between two  $T_N$  sites on the BNML surface. The brown, pink and blue balls represent Al, B and N atoms, respectively.

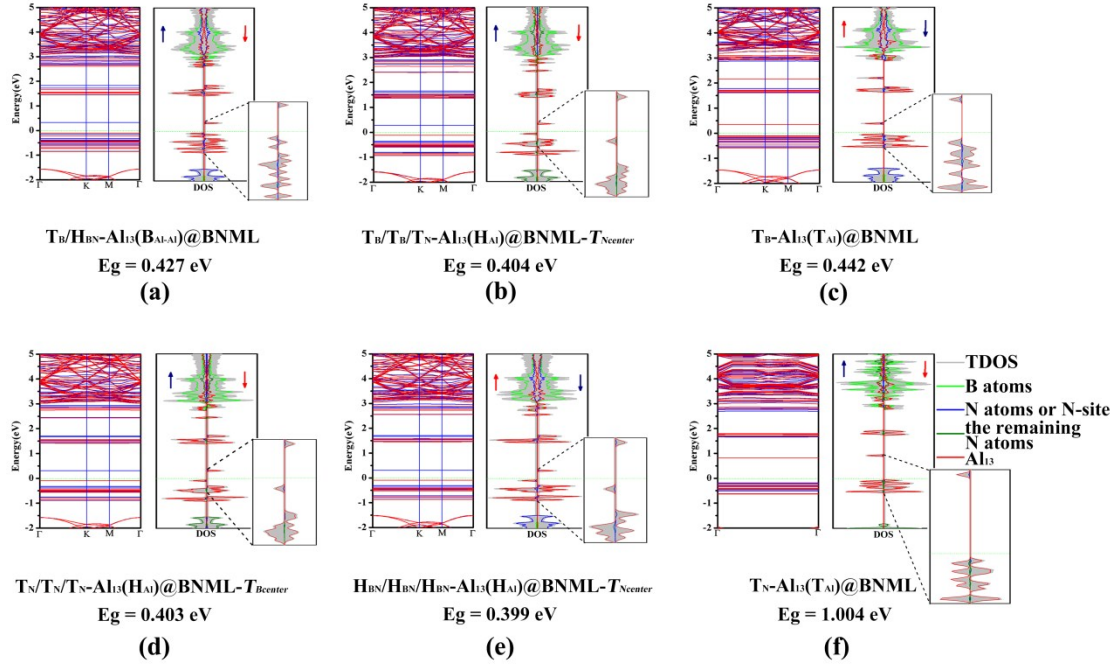

**Figure S3.** The band structures and corresponding DOSs for  $T_B/H_{BN}-Al_{13}(B_{Al})@BNML$  (a),  $T_B/T_B/T_N-Al_{13}(H_{Al})@BNML-T_{Ncenter}$  (b),  $T_B-Al_{13}(T_{Al})@BNML$  (c),  $T_N/T_N/T_N-Al_{13}(H_{Al})@BNML-T_{Bcenter}$  (d) and  $H_{BN}/H_{BN}/H_{BN}-Al_{13}(H_{Al})@BNML-T_{Ncenter}$  (e), respectively. (f) The calculated band structure using the HSE hybrid functional of  $T_N-Al_{13}(T_{Al})@BNML$  system.  $E_g$  refers to the energy gap between the top valence band (TVB) and the bottom conduction band (BCB). The blue and red lines in the band structures denote the spin-up ( $\uparrow$ ) and spin-down ( $\downarrow$ ) channels, respectively. The Fermi-level is set as zero and indicated by the green dotted line. Note that the DOS around the Fermi-level for (a~f) is zoomed in to make it clearer.
